# Supplementary material for: Exacerbation of Thrombotic Responses to Silver Nanoparticles in Hypertensive Mouse Model
Source: Hindawi journal article supplement (doi:10.1155/2022/2079630), 2022-01-01

Figure S1

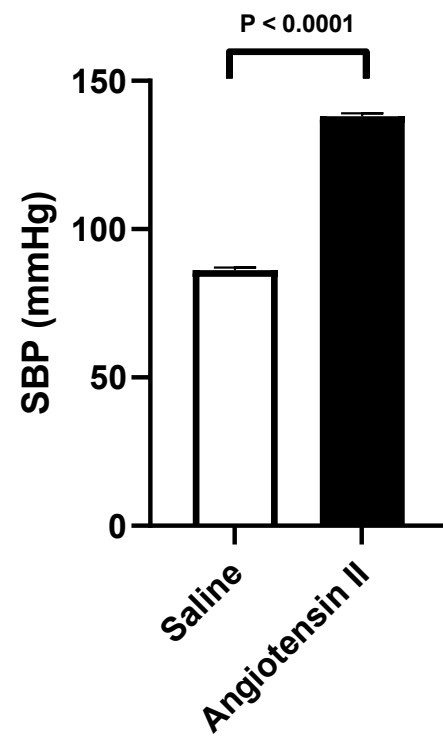

Supplement: f1 [file 2079630.f1.pdf]
